# Supplementary material for: Amorphous RuPd bimetallene for hydrogen evolution reaction in acidic and alkaline conditions: a first-principles study
Source: Royal Society of Chemistry journal article supplement (doi:10.1039/d3cp05512d), 2024-01-01
Supplement: d3cp05512d1.pdf [file d3cp05512d1.pdf]

## Supporting Information

### Amorphous RuPd bimetallic for hydrogen evolution reaction in acidic and alkaline conditions: A first-principles study

Manman Liu<sup>a</sup>, Xiaofeng Fan<sup>a,\*</sup>, Xiaoqiang Cui<sup>a</sup>, Weitao Zheng<sup>a</sup> and David J. Singh<sup>a,b</sup>

a. Key Laboratory of Automobile Materials (Jilin University), Ministry of Education, and College of Materials Science and Engineering, Jilin Provincial International Cooperation Key Laboratory of High-Efficiency Clean Energy Materials, Jilin University, Changchun, 130012, China

b. Department of Physics and Astronomy, University of Missouri, Columbia, Missouri 65211-7010, USA

\*, Correspondence and requests for materials should be addressed,  
Email: xffan@jlu.edu.cn (X. Fan)

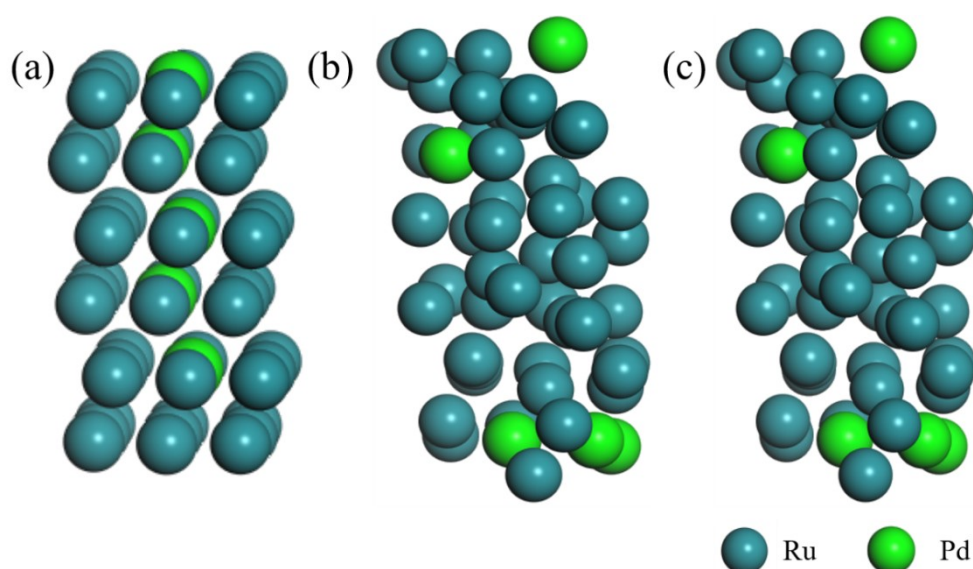

Fig. S1. (a) Original crystal structure. The obtained structure that (b) the crystal cell was relaxed for 20 ps at 2600 K, (b) then the disordered structure was relaxed to a local energy minimum at 0 K.

### Change of free energy of OH\*

The adsorption energy of different adsorbents ( $H_2O^*$ ,  $H-OH^*$ ,  $OH^*$ ,  $H^*$ ) in the alkaline HER process is calculated as follows,

$$\Delta E_{H_2O^*} = E_{H_2O^*} - E^* - E_{H_2O} \quad S1$$

$$\Delta E_{H-OH^*} = E_{H-OH^*} - E^* - E_{H_2O} \quad S2$$

$$\Delta E_{OH^* + H^*} = E_{OH^* + H^*} - E^* - E_{H_2O} \quad S3$$

$$\Delta E_{OH^*} = E_{OH^*} - E^* - (E_{H_2O} - 1/2E_{H_2}) \quad S4$$

$$\Delta E_{H^*} = E_{H^*} - E^* - 1/2E_{H_2} \quad S5$$

According to the formula  $H_2 \rightarrow 2(H^+ + e^-)$ , the energy of the hydroxide can be calculated by the following formula,

$$E_{OH^-} = E_{H_2O} - 1/2E_{H_2} \quad S6$$

The change of free energy ( $\Delta G$ ) for each step of alkaline HER is all obtained by the following formula,

$$\Delta G = \Delta E + \Delta ZPE - T\Delta S \quad S7$$

where  $\Delta E$ ,  $\Delta ZPE$  and  $\Delta S$  represent the reaction energy, zero energy difference and entropy change at each step. The detailed calculation data above are shown in Table S3, 4.

### The calculation about exchange current density

Considering that part of the electrochemical cell is hydrogen evolution on the metal electrode, the current density during the hydrogen evolution process can be expressed as[1],

$$i = -er \quad \text{S8}$$

where  $r$  is the net rate. In equilibrium, the exchange current density is related to forward (or backward) rate, and can be written as follows,

$$i = -er_1 \quad \text{S9}$$

The forward rate can be written as follows,

$$r_1 = k_1(1 - \theta)c_{H^+}, \quad \text{S10}$$

where  $k_1$  is rate constant,  $\theta$  is H coverage,  $c_{H^+}$  is the concentration of protons in the electrolyte. The coverage of hydrogen can be calculated as follows,

$$\theta = \frac{K}{1 + K}, \quad \text{S11}$$

where  $K = \exp\left(\frac{-\Delta G_{H^*}}{kT}\right)$ . When  $\Delta G_{H^*} < 0$ ,  $k_1 = k_0$ . For any PH less than 7, the exchange current density may be expressed as,

$$i_0 = -ek_0 \frac{1}{1 + \exp\left(\frac{-\Delta G_{H^*}}{kT}\right)} 10^{(-PH)}$$

S12

When  $\Delta G_{H^*} > 0$ ,  $k_1 = k_0 \exp\left(\frac{-\Delta G_{H^*}}{kT}\right)$ . In this case, the exchange current density can be expressed as:

$$i_0 = -ek_0 \frac{1}{1 + \exp\left(\frac{-\Delta G_{H^*}}{kT}\right)} \exp\left(\frac{-\Delta G_{H^*}}{kT}\right) 10^{(-PH)}$$

S13

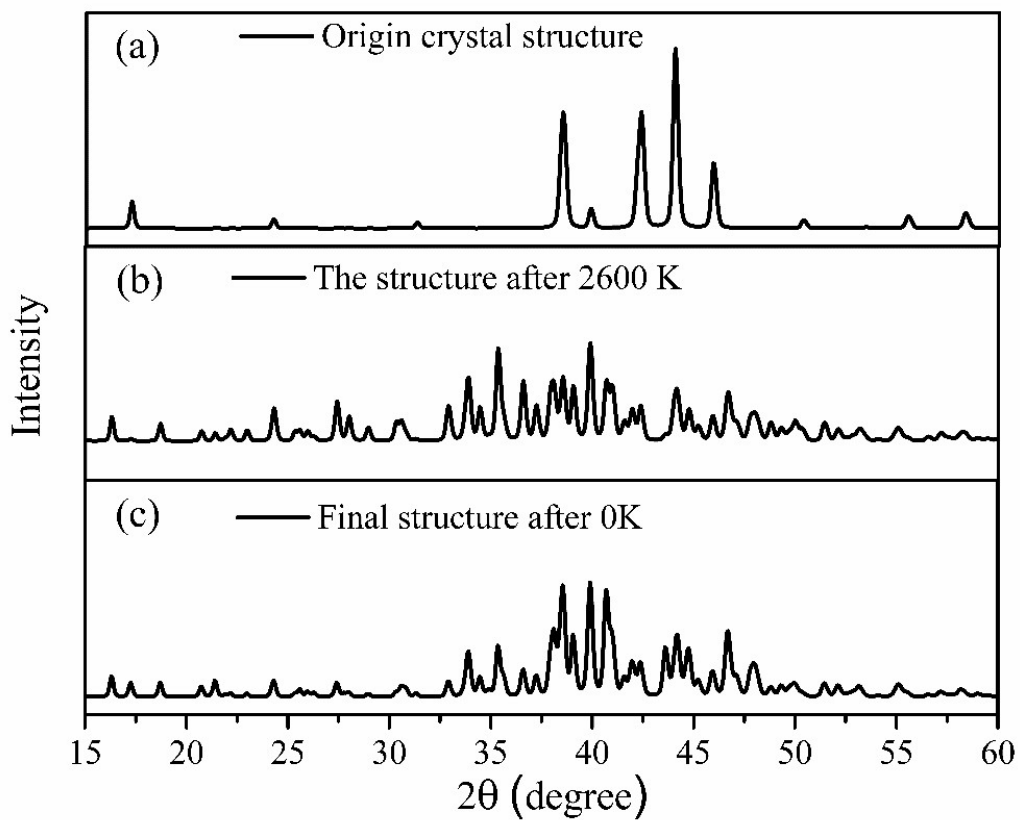

Fig.S2. X-ray diffraction pattern for (a) original crystal structure, (b) the obtained structure after 2600 K, (b) final structure after 0 K, which correspond to Fig. S1.

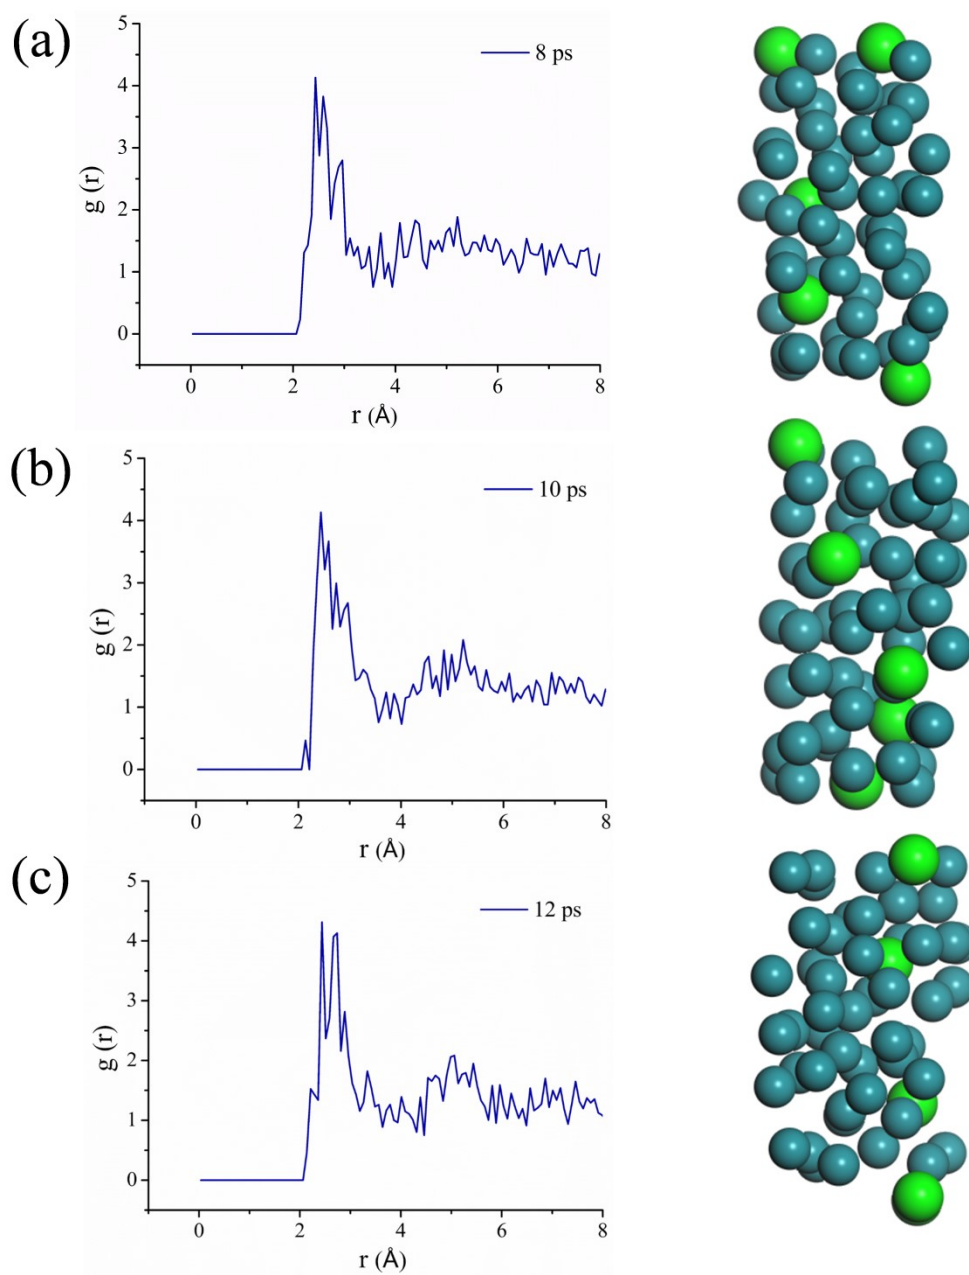

Fig.S3. The radial distribution functions and snapshots of structure of c-RuPd at (a) 8 ps, (b)10 ps and (c)12 ps in the process of annealing under 2600 K.

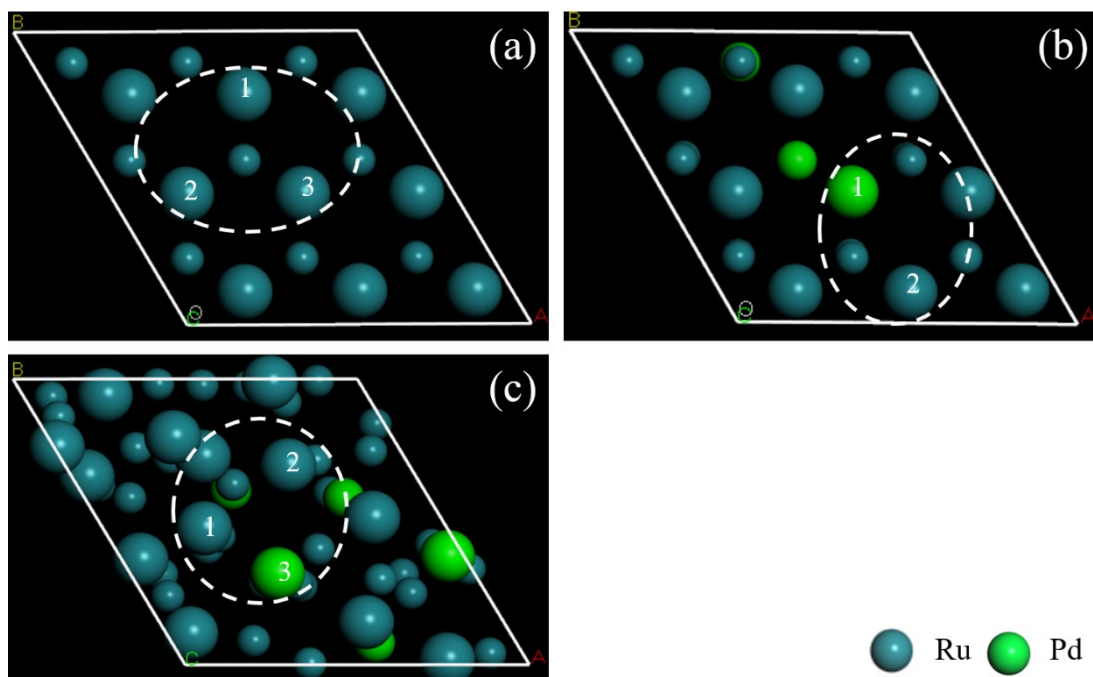

Fig. S4. The atoms at the optimal H adsorption site (numbered in the circle) on (a) Ru (0001), (b) c-RuPd, and (c) am-RuPd, which were selected for the partial density of states (PDOS) in Fig. 4a.

Table S1.  $\Delta G_H^*$  and  $\text{Log}i_0$  values at different site for Ru (0001), c-RuPd and am-RuPd

| site      | $\Delta G_H^*$ (eV) | $\text{Log}i_0$ (A/site) |
|-----------|---------------------|--------------------------|
| Pt (111)  | -0.140              | -18.848                  |
| Ru (0001) | -0.272              | -21.067                  |
| c-RuPd-1  | -0.308              | -21.664                  |
| c-RuPd-2  | -0.305              | -21.624                  |
| c-RuPd-3  | -0.164              | -19.252                  |
| c-RuPd-4  | -0.143              | -18.906                  |
| c-RuPd-5  | -0.268              | -21.000                  |
| c-RuPd-6  | -0.211              | -20.036                  |
| am-RuPd-1 | -0.225              | -20.279                  |
| am-RuPd-2 | -0.224              | -20.266                  |
| am-RuPd-3 | -0.041              | -17.249                  |
| am-RuPd-4 | -0.043              | -17.289                  |
| am-RuPd-5 | 0.108               | -18.319                  |
| am-RuPd-6 | -0.138              | -18.820                  |

Table S2 Zero energy difference ( $\Delta E_{ZPE}$ ) and entropy change ( $T\Delta S$ ) under different temperature for H\*

|               | T $\Delta S$ |       |       |       |       | $\Delta E_{ZPE}$ |
|---------------|--------------|-------|-------|-------|-------|------------------|
|               | 300K         | 320 K | 340K  | 360K  | 380K  |                  |
| H* (Pt)       | -0.21        | -0.22 | -0.23 | -0.24 | -0.26 | 0.1              |
| H* (Ru(0001)) | -0.21        | -0.23 | -0.24 | -0.25 | -0.27 | 0.02             |
| H*(c-RuPd)    | -0.21        | -0.23 | -0.24 | -0.26 | -0.27 | 0.02             |
| H*(am-RuPd)   | -0.2         | -0.21 | -0.22 | -0.23 | -0.25 | 0.02             |

Table S3.  $\Delta G_H^*$  and  $\text{Log}i_0$  values at different site for Ru (0001), c-RuPd and am-RuPd at 300K-380K

| site      | $\Delta G_H^*$ (eV) |        |        |        |        |
|-----------|---------------------|--------|--------|--------|--------|
|           | 300K                | 320 K  | 340 K  | 360 K  | 380K   |
| Pt (111)  | -0.14               | -0.13  | -0.12  | -0.11  | -0.09  |
| Ru (0001) | -0.272              | -0.252 | -0.242 | -0.232 | -0.212 |
| c-RuPd-1  | -0.308              | -0.288 | -0.278 | -0.258 | -0.248 |
| c-RuPd-2  | -0.305              | -0.285 | -0.275 | -0.255 | -0.245 |
| c-RuPd-3  | -0.164              | -0.144 | -0.134 | -0.114 | -0.104 |
| c-RuPd-4  | -0.143              | -0.123 | -0.113 | -0.093 | -0.083 |
| c-RuPd-5  | -0.268              | -0.248 | -0.238 | -0.218 | -0.208 |
| c-RuPd-6  | -0.211              | -0.191 | -0.181 | -0.161 | -0.151 |
| am-RuPd-1 | -0.225              | -0.195 | -0.185 | -0.165 | -0.155 |
| am-RuPd-2 | -0.224              | -0.194 | -0.184 | -0.164 | -0.154 |
| am-RuPd-3 | -0.041              | -0.011 | 0.001  | 0.021  | 0.031  |
| am-RuPd-4 | -0.043              | -0.013 | -0.003 | 0.023  | 0.033  |
| am-RuPd-5 | 0.108               | 0.138  | 0.148  | 0.168  | 0.178  |
| am-RuPd-6 | -0.138              | -0.108 | -0.098 | -0.078 | -0.068 |



Table S4. H<sub>2</sub>O adsorption energy ( $\Delta E_{\text{H}_2\text{O}}^*$ ) and H<sub>2</sub>O adsorption free energy ( $\Delta G_{\text{H}_2\text{O}}^*$ ) for different H<sub>2</sub>O adsorption configuration

| model      | $\Delta E_{\text{H}_2\text{O}}^*$ | $\Delta G_{\text{H}_2\text{O}}^*$ |
|------------|-----------------------------------|-----------------------------------|
| Ru         | -0.387                            | 0.110                             |
| c-RuPd-m1  | -0.436                            | 0.124                             |
| c-RuPd-m1  | -0.169                            | 0.391                             |
| am-RuPd-m1 | -0.638                            | -0.101                            |
| am-RuPd-m2 | -0.448                            | 0.089                             |
| am-RuPd-m3 | -0.572                            | -0.035                            |
| am-RuPd-m4 | -0.493                            | 0.044                             |
| am-RuPd-m5 | -0.213                            | 0.324                             |
| am-RuPd-m6 | -0.216                            | 0.321                             |
| am-RuPd-m7 | -0.120                            | 0.417                             |

Table S5. Adsorption Energies ( $\Delta E$ ), zero energy difference ( $\Delta E_{\text{ZPE}}$ ), the product of temperature and entropy change ( $T\Delta S$ ) and free energy ( $\Delta G$ ) for different intermediate on H<sub>2</sub>O dissociation

|           | intermediate      | $\Delta E$ | $\Delta E_{\text{ZPE}}$ | $T\Delta S$ | $\Delta E_{\text{ZPE}} - T\Delta S$ | $\Delta G$ |
|-----------|-------------------|------------|-------------------------|-------------|-------------------------------------|------------|
| Ru (0001) | H <sub>2</sub> O* | -0.387     | 0.066                   | -0.431      | 0.497                               | 0.11       |
|           | H-OH*             | 0.445      | -0.133                  | -0.50       | 0.367                               | 0.812      |
|           | OH*+H*            | -0.455     | -0.048                  | -0.525      | 0.477                               | 0.022      |
| c-RuPd    | H <sub>2</sub> O* | -0.436     | 0.072                   | -0.488      | 0.56                                | 0.124      |
|           | H-OH*             | 0.378      | -0.124                  | -0.505      | 0.381                               | 0.759      |
|           | OH*+H*            | -0.277     | -0.079                  | -0.521      | 0.442                               | 0.165      |
| am-RuPd   | H <sub>2</sub> O* | -0.572     | 0.076                   | -0.461      | 0.537                               | -0.035     |
|           | H-OH*             | -0.080     | -0.099                  | -0.519      | 0.42                                | 0.34       |
|           | OH*+H*            | -1.239     | -0.071                  | -0.489      | 0.418                               | -0.821     |

Table S6. The entropy change ( $T\Delta S$ ) for different intermediate on  $H_2O$  dissociation at 320-380K.

| □            | intermediate | $\Delta E_{ZPE}$ | $T\Delta S$ |         |        |        |
|--------------|--------------|------------------|-------------|---------|--------|--------|
|              |              |                  | 320K        | 340K    | 360K   | 380K   |
| Ru<br>(0001) | H2O*         | 0.066            | -0.458      | -0.4844 | -0.511 | -0.537 |
|              | H-OH*        | -0.133           | -0.533      | -0.564  | -0.597 | -0.628 |
|              | OH*+H*       | -0.048           | -0.559      | -0.564  | -0.597 | -0.628 |
| c-RuPd       | H2O*         | 0.072            | -0.521      | -0.553  | -0.585 | -0.616 |
|              | H-OH*        | -0.124           | -0.538      | -0.57   | -0.603 | -0.634 |
|              | OH*+H*       | -0.079           | -0.557      | -0.591  | -0.626 | -0.659 |
| am-RuPd      | H2O*         | 0.076            | -0.49       | -0.518  | -0.547 | -0.575 |
|              | H-OH*        | -0.099           | -0.554      | -0.588  | -0.623 | -0.656 |
|              | OH*+H*       | -0.071           | -0.52       | -0.55   | -0.58  | -0.609 |

Table S7. The free energy ( $\Delta G$ ) for different intermediate on  $H_2O$  dissociation at 320-380K.

| □         | intermediate | $\Delta E$ | $\Delta G$ |        |       |       |
|-----------|--------------|------------|------------|--------|-------|-------|
|           |              |            | 320K       | 340K   | 360K  | 380K  |
| Ru (0001) | H2O*         | -0.39      | 0.137      | 0.1634 | 0.19  | 0.216 |
|           | H-OH*        | 0.445      | 0.845      | 0.876  | 0.909 | 0.94  |
|           | OH*+H*       | -0.46      | 0.056      | 0.061  | 0.094 | 0.125 |
| c-RuPd    | H2O*         | -0.44      | 0.157      | 0.189  | 0.221 | 0.252 |
|           | H-OH*        | 0.378      | 0.792      | 0.824  | 0.857 | 0.888 |
|           | OH*+H*       | -0.28      | 0.201      | 0.235  | 0.27  | 0.303 |
| am-RuPd   | H2O*         | -0.57      | -0.006     | 0.022  | 0.051 | 0.084 |
|           | H-OH*        | -0.08      | 0.375      | 0.409  | 0.444 | 0.477 |
|           | OH*+H*       | -1.24      | -0.79      | -0.76  | -0.73 | -0.7  |

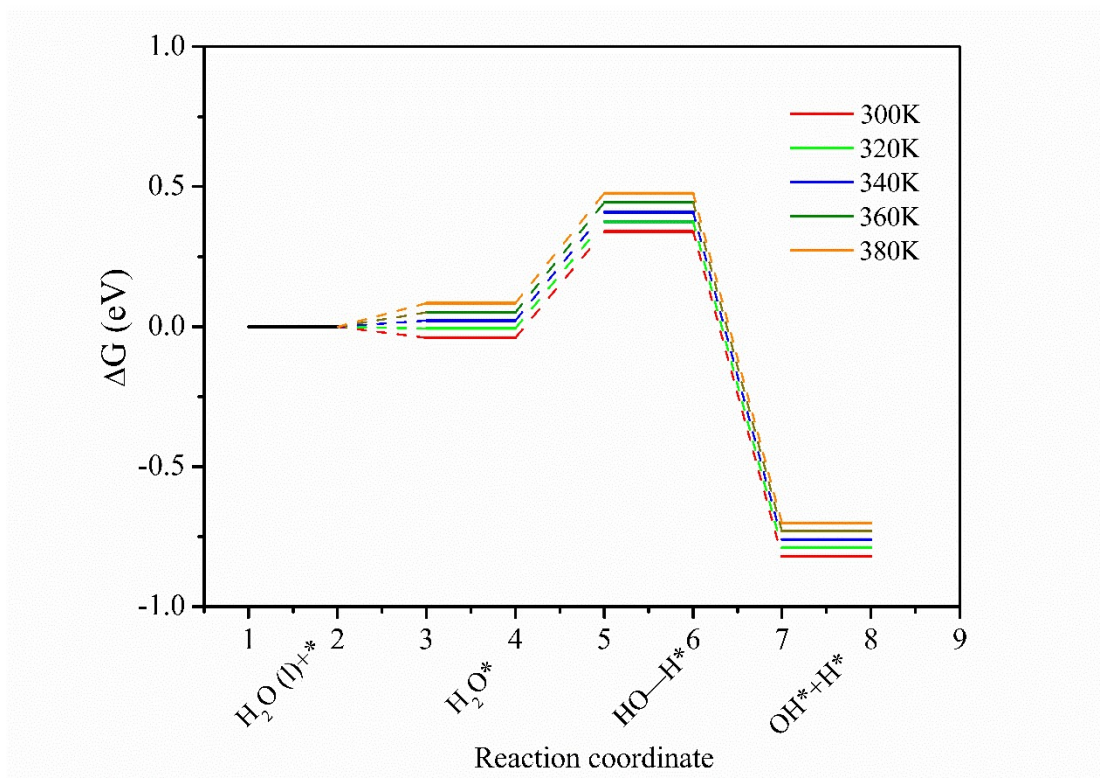

Fig. S5. The free energy diagram of H<sub>2</sub>O dissociation processes for am-RuPd at 300-380K.

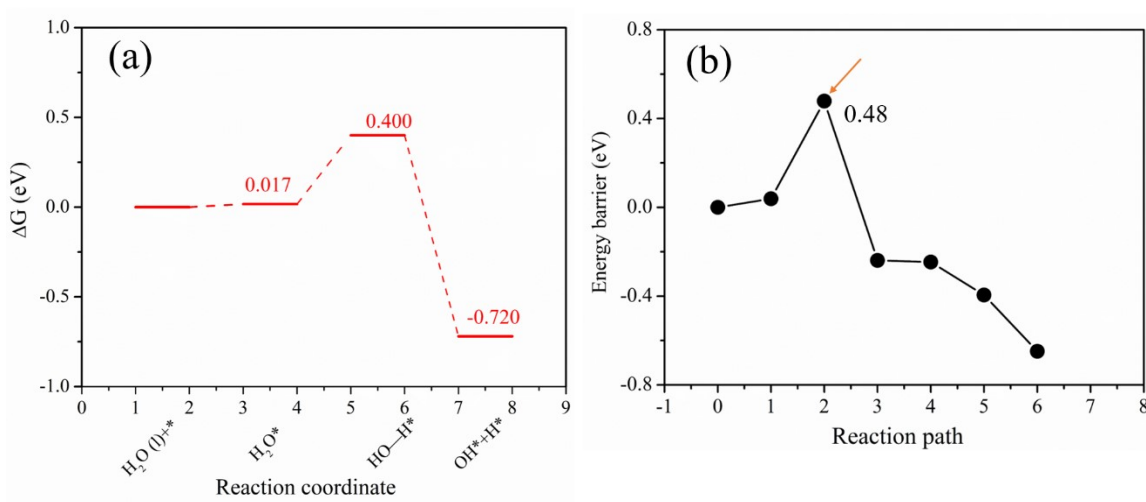

Fig. S6. (a) The free energy diagram of H<sub>2</sub>O dissociation processes and (b) the reaction path of H<sub>2</sub>O dissociation for am-RuPd calculated by RPBE.

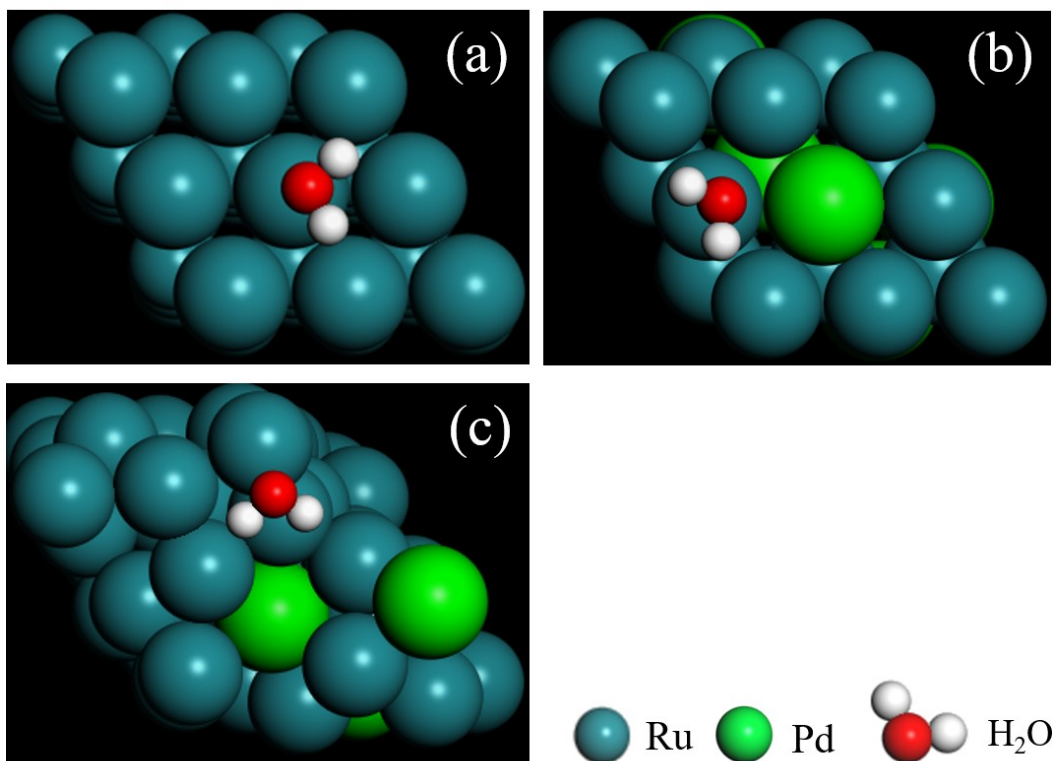

Fig. S7. H<sub>2</sub>O adsorption structure on (a) Ru (0001), (b) c-RuPd, (c) am-RuPd corresponding to Fig.5

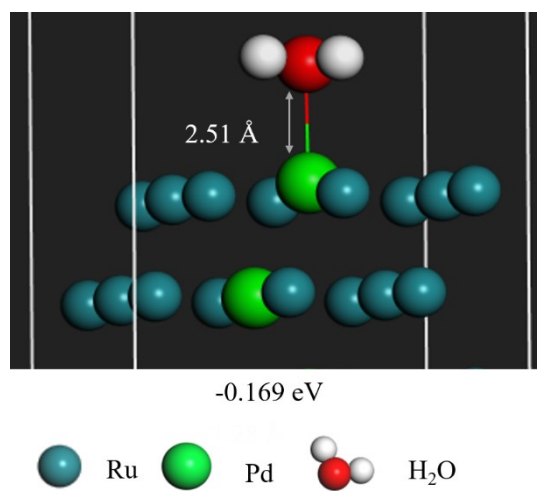

Fig. S8. The stable configurations for H<sub>2</sub>O adsorption on c-RuPd as well as corresponding Ru-O bond length and  $\Delta E_{\text{H}_2\text{O}^*}$  values

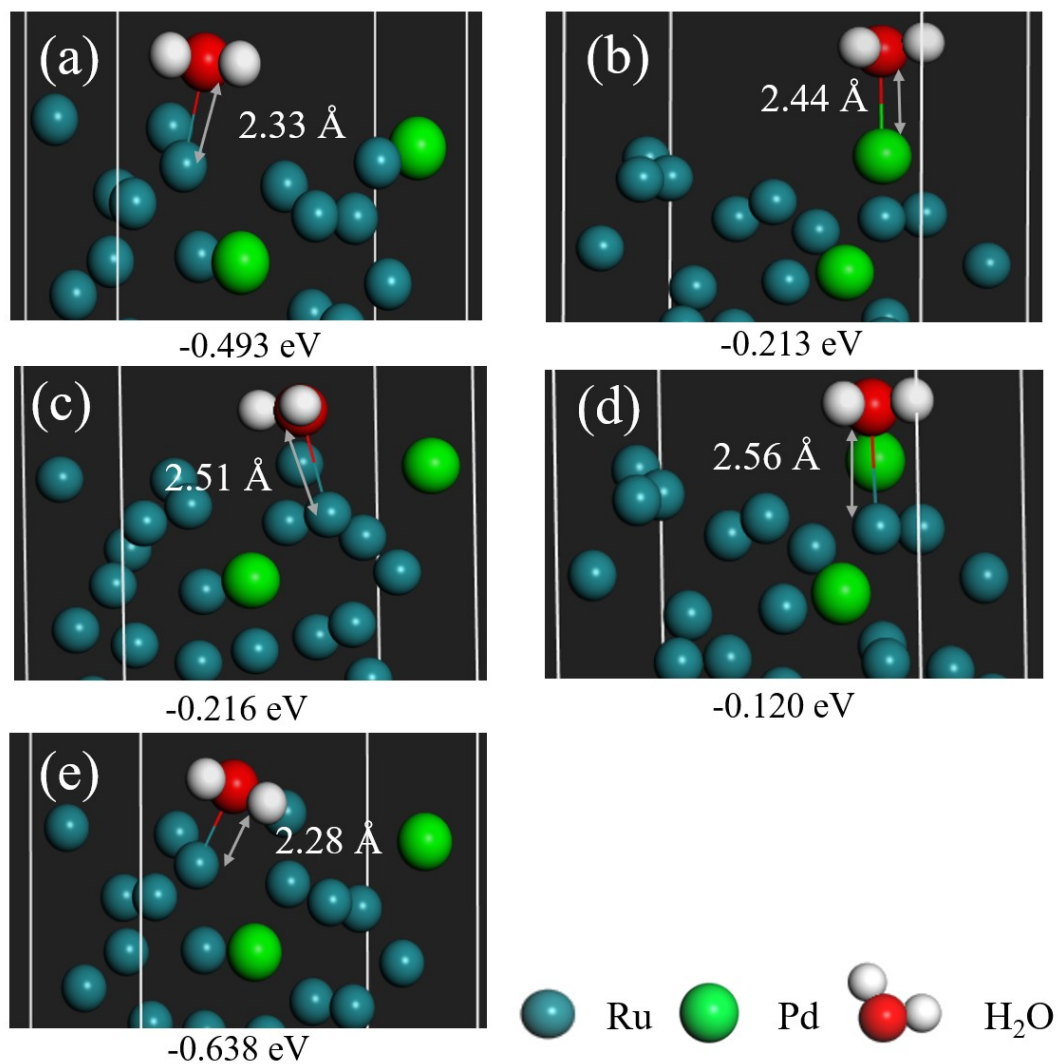

Fig. S9. The stable configurations for H<sub>2</sub>O adsorption on am-RuPd as well as corresponding Ru-O bond length and  $\Delta E_{\text{H}_2\text{O}^*}$  values

Table S8. The energy levels of three molecular orbitals for H<sub>2</sub>O/Ru(0001), H<sub>2</sub>O/c-RuPd and H<sub>2</sub>O/am-RuPd. This table corresponds to Fig. 9.

|                            | 1b <sub>1</sub> (eV) | 3a <sub>1</sub> (eV) | 1b <sub>2</sub> (eV) |
|----------------------------|----------------------|----------------------|----------------------|
| H <sub>2</sub> O/Ru (0001) | -4.94                | -6.59                | -9.84                |
| H <sub>2</sub> O/c-RuPd    | -4.93                | -6.72                | -10.06               |
| H <sub>2</sub> O/am-RuPd   | -5.40                | -6.89                | -10.03               |

Table S9. Adsorption energies ( $\Delta E$ ), zero energy difference ( $\Delta ZPE$ ), the product of temperature and entropy change ( $T\Delta S$ ) and free energy ( $\Delta G$ ) of (OH\*+H\*) and (OH<sup>-</sup>+H\*) on OH\* desorption process.

| □         | □                          | $\Delta E$ | $\Delta ZPE$ | $T\Delta S$ | $\Delta ZPE-T\Delta S$ | $\Delta G$ |
|-----------|----------------------------|------------|--------------|-------------|------------------------|------------|
| Ru (0001) | OH*+H*                     | -0.455     | -0.048       | -0.525      | 0.477                  | 0.022      |
|           | OH <sup>-</sup> +H*        | -0.443     | 0.027        | -0.208      | 0.235                  | -0.208     |
| c-RuPd    | OH*+H*                     | -0.277     | -0.079       | -0.521      | 0.442                  | 0.165      |
|           | OH <sup>-</sup> +H*        | -0.542     | 0.027        | -0.208      | 0.235                  | -0.307     |
| am-RuPd   | OH*+H*<br>(site1)          | -1.239     | -0.071       | -0.489      | 0.418                  | -0.821     |
|           | OH*+H*<br>(site2)          | -0.811     | -0.071       | -0.489      | 0.418                  | -0.393     |
|           | OH <sup>-</sup> +H*(site1) | -0.760     | 0.03         | -0.1935     | 0.224                  | -0.536     |
|           | OH <sup>-</sup> +H*(site2) | -0.753     | 0.03         | -0.1935     | 0.224                  | -0.529     |

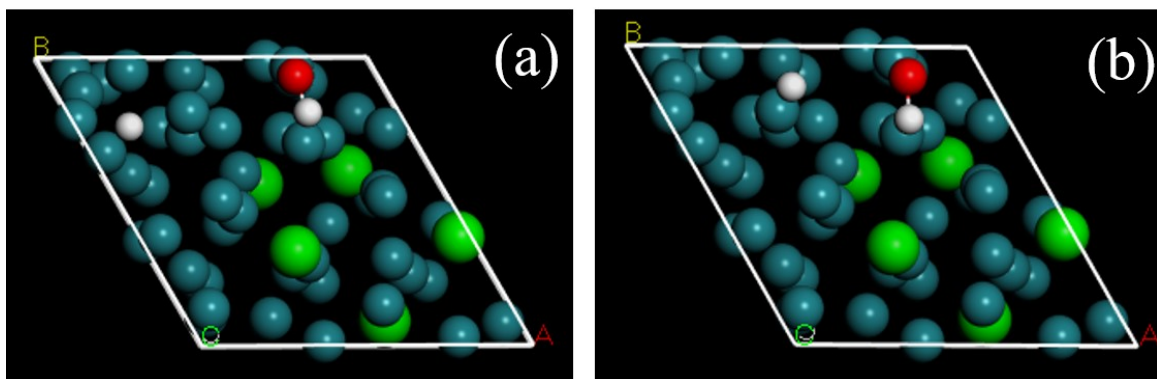

Fig.S9. The adsorption of OH\* and H\* on (a) am-RuPd-site 1 and (b) am-RuPd-site 1 for OH\* desorption process

### References

- [1] Nørskov J K, Bligaard T, Logadottir A, Kitchin J R, Chen J G, Pandelov S, Stimming U, T. trends in the Exchange Current for Hydrogen Evolution. *J. Electrochem. Soc.* 2005;152:J23-J26.
